# Supplementary material
Source: PubMed Central journal article supplement (PMC3934702)
Supplement: tjp0592-0571-sd1.pdf [file tjp0592-0571-sd1.pdf]

## **Supplemental Methods**

### ***mEPSC recordings***

For measurements of miniature excitatory post synaptic currents (mEPSCs), CA1 pyramidal cells were patched in the presence of 1  $\mu$ M tetrodotoxin to prevent spontaneous action potentials and 100  $\mu$ M picrotoxin to prevent inhibitory currents. Recording were made for a minimum of 10 min.

### ***Spine analysis***

Spine analysis was performed as previously described (Larimore et al., 2009) with minor modification. CA1 pyramidal cells were patched as described above with 135  $\mu$ M Alexa 594 (Invitrogen, Carlsbad, CA) present in the patch pipette in addition to normal IRS and held for >1hr prior to fixation in 4% PFA. Sections were mounted for confocal microscopy, and images were acquired with a Fluoview FV-300 laser-scanning confocal microscope (Olympus; Center Valley, PA) using an oil immersion 100 $\times$  objective lens. Optical sections in the z-axis were acquired at 0.1  $\mu$ m intervals through each dendritic branch. Dendritic spines of CA1 pyramidal neurons were visualized and counted in maximum-intensity projections of the z-stacks using ImageJ software. Spines were counted only if they were continuous with the parent dendrite; density is reported as spines/10  $\mu$ M of dendrite.

### **Supplemental Reference**

Larimore JL, Chapleau CA, Kudo S, Theibert A, Percy AK, Pozzo-Miller L (2009) Bdnf overexpression in hippocampal neurons prevents dendritic atrophy caused by Rett-associated MECP2 mutations. *Neurobiol Dis* 34:199-211.

## Supplemental Figures

### Figure S1, related to Figure 1

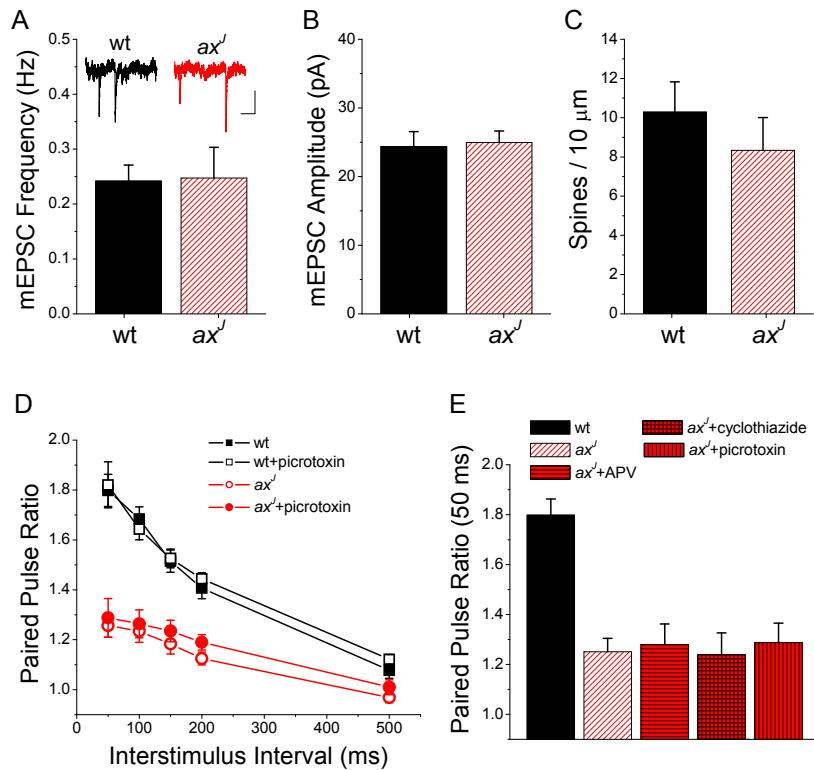

Figure S1.

There is no difference in mEPSC frequency (A) or amplitude (B) in CA1 pyramidal cells from *ax<sup>-/-</sup>* mice (n=5) compared to wt (n=5). Insets: example traces of mEPSCs from wt and *ax<sup>-/-</sup>*. Scale bars: 200 ms, 10 pA. C) No difference in spine number was detected between *ax<sup>-/-</sup>* and wt mice. n= 8 dendrites from 2 mice for both *ax<sup>-/-</sup>* and wt. D) Paired-pulse ratio is not altered by blocking GABA<sub>A</sub> receptors with picROTOXIN in wt or *ax<sup>-/-</sup>* mice, n= 5 wt, n= 9 *ax<sup>-/-</sup>*. E) Summary of group data showing no effects of APV (n=5), cyclothiazide (n=4), or picROTOXIN (n=9) on the paired pulse ratio at 50 ms at SC synapses from *ax<sup>-/-</sup>* mice. No effect was seen in wt mice (n= 6 APV, n=4 cyclothiazide, n=5 picROTOXIN, data not shown).

**Figure S2, related to Figure 2**

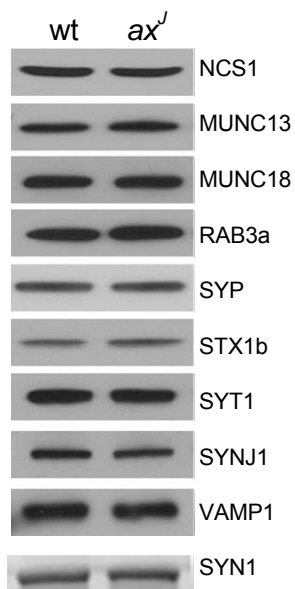

Figure S2. Presynaptic protein levels are not changed in *ax*<sup>Δ</sup> mice.

Immunoblots of presynaptic proteins from hippocampal extracts show no difference between wt and *ax*<sup>Δ</sup> in neuronal calcium sensor 1 (NCS1), MUNC13, MUNC18, RAB3a, synaptophysin (SYP), syntaxin 1b (STX1b), synaptotagmin 1 (SYT1), synaptojanin 1 (SYNJ1), synaptobrevin 1 (VAMP1), or synapsin 1 (SYN1).
